# Supplementary material for: Insights into the capacity fading and failure mechanism of an O3-NaNi1/3Fe1/3Mn1/3O2 layered oxide cathode material for sodium-ion batteries
Source: Royal Society of Chemistry journal article supplement (doi:10.1039/d4ta00060a), 2024-01-01
Supplement: d4ta00060a1.pdf [file d4ta00060a1.pdf]

## Supplementary Information

# Insight on capacity fading and failure mechanism of O3-NaNi<sub>1/3</sub>Fe<sub>1/3</sub>Mn<sub>1/3</sub>O<sub>2</sub> layered oxide cathode material for sodium ion battery

Xiaohan Zhao<sup>a</sup>, Lijuan Hou<sup>a</sup>, Qi Liu<sup>a\*</sup>, Yanshuo Zhao<sup>a</sup>, Daobin Mu<sup>a</sup>, Zhikun Zhao<sup>a\*</sup>, Li Li<sup>a</sup>,  
Renjie Chen<sup>a</sup>, Feng Wu<sup>a</sup>

<sup>a</sup> School of Material Science and Engineering, Beijing Institute of Technology, Beijing, 100081,  
China

\* Corresponding authors: [liuqi985@bit.edu.cn](mailto:liuqi985@bit.edu.cn), [zzkun007@bit.edu.cn](mailto:zzkun007@bit.edu.cn)

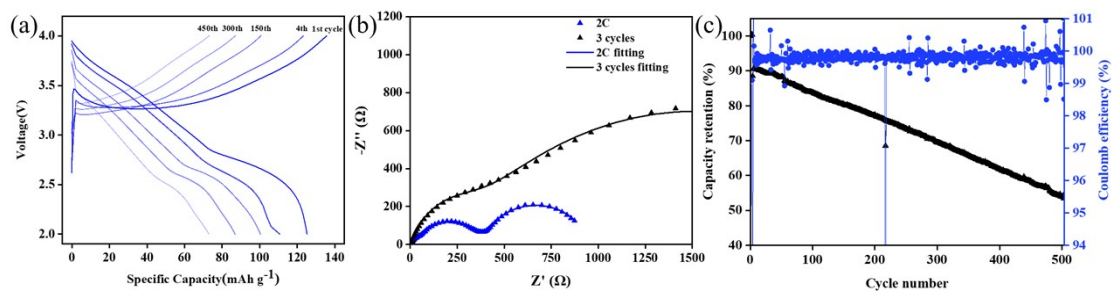

Fig. S1. Electrochemical characterization of NFM333 half-cell. (a) Charge-discharge curves of the 1st, 4th, 150th, 300th and 450th cycles; (b) Nyquist plots and fitting curves after 3 pre-cycles and 500 cycles at 2 C; (c) Capacity retention and Coulombic efficiency.

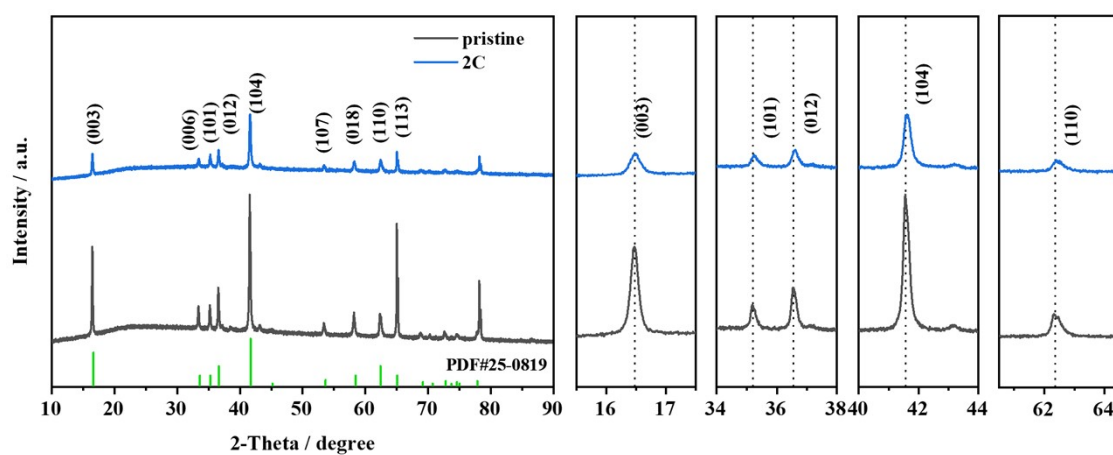

Fig. S2. XRD spectra and partial enlargements of the NFM333 cathode of the original and after 500 cycles at 2C.

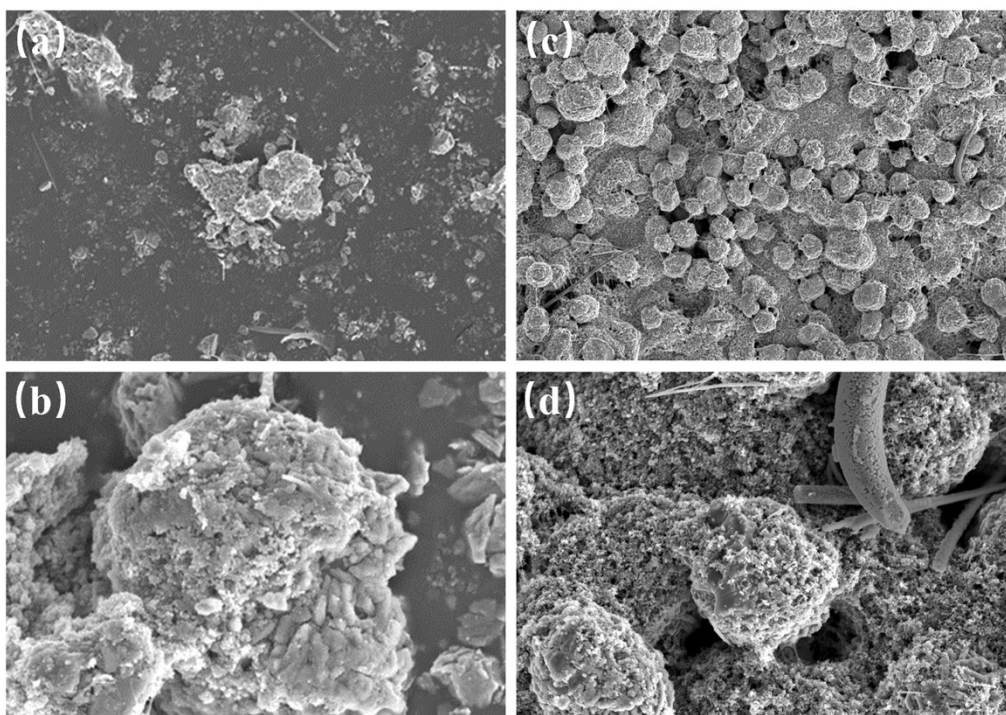

Fig. S3. SEM images of the 2C-cycled cathode (a-b) particles and (c-d) sheet.

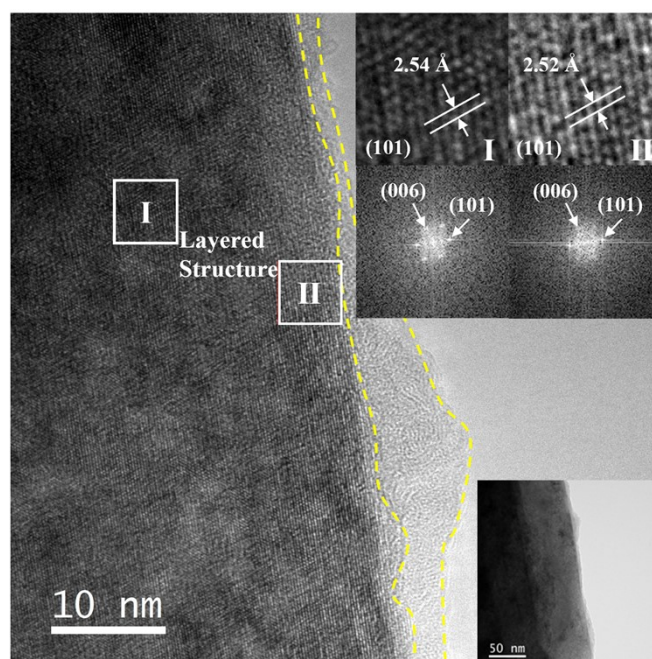

Fig. S4. Microcrystalline TEM image and its SAED pattern of 2C-cycled NFM333 cathode.

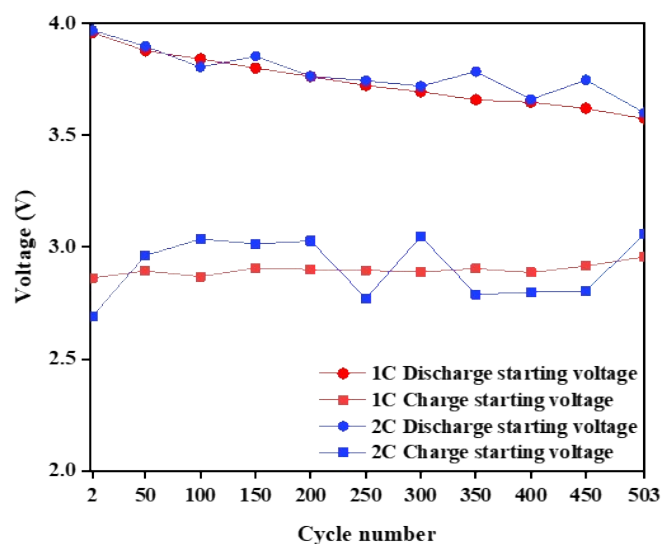

Fig. S5. Charging and discharging starting voltages of 1C and 2C batteries at different cycle number.

Table S1. Impedance fitting results of NFM333 after pre-cycling and 500 cycles at different current densities.

| C-rate        | $R_b$ ( $\Omega$ ) | $R_f$ ( $\Omega$ ) | $R_{ct}$ ( $\Omega$ ) |
|---------------|--------------------|--------------------|-----------------------|
| 0.5C 3 cycles | 3.91               | 250.4              | 2493                  |
| 1C            | 7.77               | 476.8              | 1071                  |
| 2C            | 3.68               | 333.4              | 586                   |

Table S2. Calibrated dissolution content of transition metal ions in cathode materials under different current densities.

| C-rate | Correction concentration (ppb) |        |             |
|--------|--------------------------------|--------|-------------|
|        | Ni                             | Fe     | Mn          |
| 1C     | 70.14                          | 245.75 | $\approx 0$ |
| 2C     | 12.91                          | 169.68 | $\approx 0$ |
